# Supplementary material
Source: Springer Nature journal article supplement (https://www.springermedizin.de/resource/supplementary/12936_2013_3124_MOESM4_ESM.pdf/9546234)

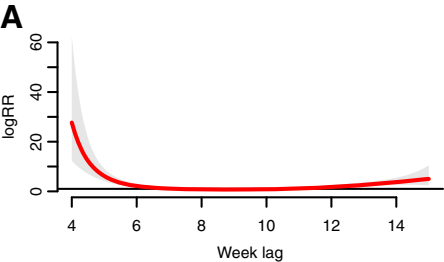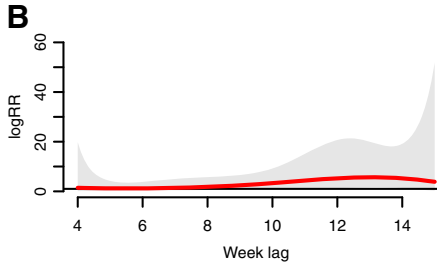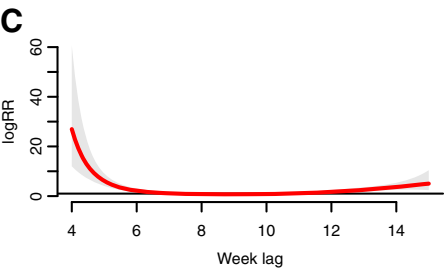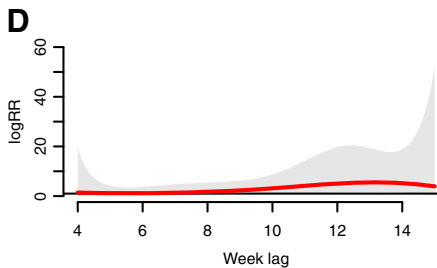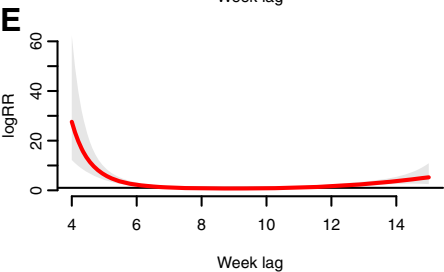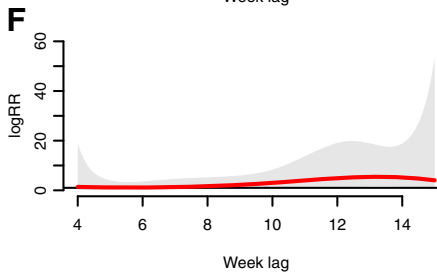

Supplement: MOESM4 [file 9546234]
